# Supplementary material
Source: publisher figshare collection journal article supplement (https://asha.figshare.com/articles/dataset/_/21357648)
Supplement: Supplementary file 1 [file 1]

**Supplemental Material S1.** Variables removed using backward stepwise deletion. SNR as dependent variable.

| <b>Fixed Effect</b>                                     | <b><i>F</i></b> | <b><i>df</i></b> | <b><i>df<sub>res</sub></i></b> | <b>MSE</b> | <b><i>p</i></b> |
|---------------------------------------------------------|-----------------|------------------|--------------------------------|------------|-----------------|
| Mask Type × Age × Inhibitory Control (Scaled)           | 0.95            | 1                | 336                            | 6.21       | .33             |
| Age × Inhibitory Control (Scaled)                       | 0.00            | 1                | 48                             | 0.00       | 1               |
| Mask Type × Reading Span (Scaled) × Age                 | 1.32            | 1                | 336                            | 8.60       | .25             |
| Reading Span (Scaled) × Age                             | 0.92            | 1                | 48                             | 6.06       | .34             |
| Mask Type × Age                                         | 1.97            | 1                | 336                            | 12.95      | .16             |
| Mask Type × Reading Span (Scaled) × PTA4 (Scaled)       | 1.95            | 1                | 336                            | 12.84      | .16             |
| Reading Span (Scaled) × PTA4 (Scaled)                   | 0.04            | 1                | 48                             | 0.25       | .85             |
| Mask Type × Inhibitory Control (Scaled) × PTA4 (Scaled) | 3.00            | 1                | 336                            | 19.89      | .08             |
| Mask Type × Reading Span (Scaled)                       | 2.37            | 1                | 336                            | 15.86      | .12             |
| Inhibitory Control (Scaled) × PTA4 (Scaled)             | 3.57            | 1                | 48                             | 24.11      | .06             |

*Note.* *df* = degree of freedom; MSE = mean squared error.
