# Supplementary material
Source: publisher figshare collection journal article supplement (https://asha.figshare.com/articles/dataset/_/21357648)
Supplement: Supplementary file 2 [file 1]

**Supplemental Material S2.** Variables removed using backward stepwise deletion. Effort as dependent variable.

| <b>Fixed Effect</b>                                           | <b><i>F</i></b> | <b><i>df</i></b> | <b><i>df<sub>res</sub></i></b> | <b>MSE</b> | <b><i>p</i></b> |
|---------------------------------------------------------------|-----------------|------------------|--------------------------------|------------|-----------------|
| Mask Type × PTA4 (Scaled) × Age × Inhibitory Control (Scaled) | 0.05            | 1                | 333.90                         | 0.16       | .83             |
| Mask Type × Material × PTA4 (Scaled) × Age                    | 0.21            | 1                | 333.93                         | 0.68       | .65             |
| Material × PTA4 (Scaled) × Age × Inhibitory Control (Scaled)  | 0.22            | 1                | 333.91                         | 0.73       | .64             |
| Mask Type × Material × PTA4 (Scaled)                          | 0.52            | 1                | 334.00                         | 1.72       | .47             |
| Material × Age × Inhibitory Control (Scaled)                  | 0.79            | 1                | 333.93                         | 2.65       | .37             |
| Material × PTA4 (Scaled) × Inhibitory Control (Scaled)        | 0.80            | 1                | 333.91                         | 2.66       | .37             |
| PTA4 (Scaled) × Age × Inhibitory Control (Scaled)             | 2.60            | 1                | 47.79                          | 8.69       | .11             |
| Material × Inhibitory Control (Scaled)                        | 2.83            | 1                | 333.91                         | 9.48       | .09             |
| Material × PTA4 (Scaled) × Age × Reading Span (Scaled)        | 2.37            | 1                | 333.92                         | 7.98       | .12             |
| Material × PTA4 (Scaled) × Age                                | 0.08            | 1                | 333.96                         | 0.28       | .77             |
| Material × PTA4 (Scaled) × Reading Span (Scaled)              | 0.22            | 1                | 334.06                         | 0.76       | .64             |
| Material × Age × Reading Span (Scaled)                        | 1.26            | 1                | 333.97                         | 4.29       | .26             |
| Material × Reading Span (Scaled)                              | 0.66            | 1                | 334.11                         | 2.25       | .42             |
| Mask Type × PTA4 (Scaled) × Age × Reading Span (Scaled)       | 3.34            | 1                | 334.12                         | 11.41      | .07             |
| Mask Type × PTA4 (Scaled) × Age                               | 0.14            | 1                | 333.95                         | 0.48       | .71             |
| PTA4 (Scaled) × Age × Reading Span (Scaled)                   | 1.64            | 1                | 47.82                          | 5.66       | .21             |
| PTA4 (Scaled) × Age                                           | 0.02            | 1                | 47.86                          | 0.08       | .88             |
| Age × Reading Span (Scaled)                                   | 0.35            | 1                | 47.80                          | 1.21       | .56             |
| PTA4 (Scaled) × Reading Span (Scaled)                         | 3.25            | 1                | 48.07                          | 11.24      | .08             |
| Reading Span (Scaled)                                         | 0.07            | 1                | 48.10                          | 0.25       | .79             |
| Mask Type × Age × Inhibitory Control (Scaled)                 | 3.30            | 1                | 334.05                         | 11.41      | .07             |
| Age × Inhibitory Control (Scaled)                             | 0.76            | 1                | 47.95                          | 2.65       | .39             |
| Mask Type × PTA4 (Scaled) × Inhibitory Control (Scaled)       | 1.83            | 1                | 334.06                         | 6.38       | .18             |
| Mask Type × PTA4 (Scaled)                                     | 0.00            | 1                | 334.14                         | 0.00       | 1               |
| Mask Type × Inhibitory Control (Scaled)                       | 0.37            | 1                | 334.04                         | 1.31       | .54             |
| PTA4 (Scaled) × Inhibitory Control (Scaled)                   | 1.34            | 1                | 47.96                          | 4.72       | .25             |
| Inhibitory Control (Scaled)                                   | 1.52            | 1                | 47.96                          | 5.32       | .22             |

*Note.* *df* = degree of freedom; MSE = mean squared error.
